# Supplementary material for: On-board smartphone micromotor-based fluorescence assays
Source: Royal Society of Chemistry journal article supplement (doi:10.1039/d1lc01106e), 2021-12-20
Supplement: d1lc01106e1.pdf [file d1lc01106e1.pdf]

## On-board smartphone micromotor-based fluorescence assays

Kaisong Yuan,<sup>a</sup> Víctor de la Asunción-Nadal,<sup>a</sup> Carmen Cuntín-Abal,<sup>a</sup> Beatriz Jurado-Sánchez<sup>a,b,\*</sup> and Alberto Escarpa<sup>a,b,\*</sup>

### Experimental

**Micromotor synthesis.** All reagents used were obtained from Sigma-Aldrich (Spain) and used without further purification. For the synthesis of ZnS@Cd<sub>x</sub>Se<sub>1-x</sub>/graphene oxide (GO)/Fe<sub>2</sub>O<sub>3</sub> Janus micromotors, polystyrene microparticles (PS) with a 20 μm diameter were used as base particles (cat. 87896). In brief, a monolayer of PS particles was covered with a ~50 nm gold layer, followed by modification with GO by incubation of 0.9 mL of ultrapure water containing the modified particles and 0.1 mL of sulfhydryl-modified graphene oxide (HS-GO) (cat. 763705) for 2 h to promote attachment to gold by thiol bond. Next, 20 μL of Fe<sub>2</sub>O<sub>3</sub> NPs solution (1 mg/mL, cat. 544884) was added and the solution was mixed for 1 h to generating the magnetic engine, followed by cleaning with a filter to remove unbounded magnetic particles, as well as 5 μL of ZnS@Cd<sub>x</sub>Se<sub>1-x</sub> QDs (cat. 753904) was added furtherly to modify the micromotors. The micromotors remains stable for 1 month without any changes in its properties. Tubular GDY/Pt micromotors were synthesized by template electrodeposition. A polycarbonate membrane compromising 5 μm diameter conical pores (Cat. WHA110413) was covered with a thin gold layer and assembled in a custom-made electrochemical cell. A Pt wire and an Ag/AgCl respectively. The outer micromotor layer was electrodeposited from a solution containing 0.1 mg mL<sup>-1</sup> of GDY and 0.5 mol L<sup>-1</sup> of Na<sub>2</sub>SO<sub>4</sub> by cyclic voltammetry (n=10, 0.3 V to -1.5 V, 50 mV s<sup>-1</sup>). The inner platinum layer was electrodeposited by applying a -0.4 V potential for 750 s and a solution containing 4 mmol L<sup>-1</sup> of chloroplatinic acid hydrate (cat. 398322) in 0.5 mol L<sup>-1</sup> boric acid (cat. B0394). The micromotors were released from the membrane (3M) electrode were used as counter and reference electrode, by polishing the Au layer and immersion in methylene chloride, isopropanol and dispersion in water. The micromotors were next modified with a Rhodamine-B labelled affinity peptide (B-VQCRLGPPWCAK, Neo-Biotech, Nanterre, France) specific for the detection of CTB. To this end 100 μL of the affinity peptide solution (100 μg mL<sup>-1</sup>) were added to an Eppendorf tube containing 1 batch of dry motors (500,000 motors), 150 mL of 3% sodium dodecyl sulfate (cat. 71727) and 200 μL of ACN:H<sub>2</sub>O<sub>2</sub> 1:3 for 1 h.

### Supporting Figures

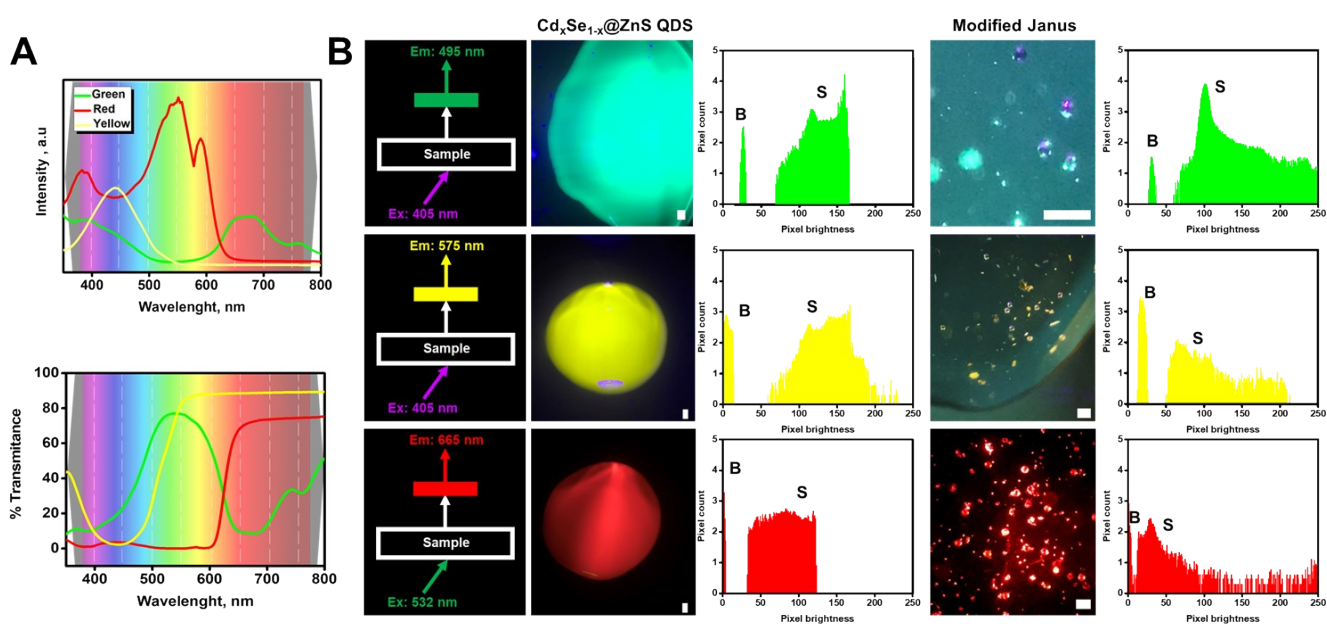

**Figure S1.** Evaluation of the performance of the smartphone-based fluorescence platform. A) Absorbance and corresponding transmittance profiles of the green, yellow or red emission filters. B) Fluorescence images of ZnS@Cd<sub>x</sub>Se<sub>1-x</sub> QDs solutions or modified Janus micromotors and corresponding histograms (in log scale) where B indicate background signal and S the fluorescence signal of the solution or the micromotor, respectively. For the specific excitation and emission conditions, see images at the left of each figure. Scale bars, 50 μm

**Table S1.** Optical fluorescence smartphones for diseases diagnosis

| Biomarker                                                                         | Disease                              | Sample         | Sample processing                                                                                                       | Analytical performance                                                                                        | Ref       |
|-----------------------------------------------------------------------------------|--------------------------------------|----------------|-------------------------------------------------------------------------------------------------------------------------|---------------------------------------------------------------------------------------------------------------|-----------|
| <b>Endpoint detection</b>                                                         |                                      |                |                                                                                                                         |                                                                                                               |           |
| <i>Escherichia coli</i>                                                           | Track urinary infections             | Urine          | Propylene microchips with integrated fluorescent sandwich immunoassay                                                   | LOD: 240 CFU mL <sup>-1</sup><br>LR: 10 <sup>0</sup> –10 <sup>7</sup> CFU mL <sup>-1</sup><br>Time: 30 min    | 1         |
| <i>Staphylococcus aureus</i>                                                      | Antibiotic resistance                | Blood          | Lateral strip based fluorescent sandwich immunoassay microchip                                                          | LOD: 4.7 × 10 <sup>3</sup> DNA copies<br>Time: 30 min                                                         | 2         |
| Viruses                                                                           | HIV                                  | Whole blood    | Microchip with DNA modified quantum dots barcodes                                                                       | LR: 10 <sup>3</sup> –10 <sup>9</sup> virus mL <sup>-1</sup><br>Time: 50 min                                   | 3         |
| Viruses                                                                           | Hepatitis B Infections               | Nasal swabs    | Microfluidic chip loop-mediated isothermal amplification                                                                | LOD: 5.5×10 <sup>4</sup> virus mL <sup>-1</sup><br>Time: 30 min                                               | 4         |
| Hepatitis B virus                                                                 | Hepatitis B                          | -              | Microfluidic chip integrating immiscible phase filtration assisted by surface tension and loop isothermal amplification | LR: 10 <sup>1</sup> –10 <sup>9</sup> virus/mL<br>Time: 60 min                                                 | 5         |
| Zika virus                                                                        | Infections                           | Serum          | Paper strip fluorescent lateral flow immunoassay                                                                        | LOD: 0.15 ng mL <sup>-1</sup><br>LR: 0.15–1000 ng mL <sup>-1</sup><br>Time: 20 min                            | 6         |
| Prostate antigen                                                                  | specific Cancer                      | Whole blood    | Microchip based sandwich enzyme linked immunoassay (test strip sample)                                                  | LOD: 0.04 ng mL <sup>-1</sup><br>LR: 0.9–60 ng mL <sup>-1</sup><br>Precision:11%<br>Time: 15 min              | 7         |
| Glucose<br>Lactose<br>Urea<br>Glutathione                                         | Diabetes                             | Serum          | MOF@enzyme modified paper sensor                                                                                        | LOD: mM range                                                                                                 | 8         |
| Dipicolinic acid (DPA)                                                            | Alzheimer, cancer prognosis          | Human serum    | Strip paper modified with carbon dots, gold nanoparticles and copper                                                    | LOD: 1 μM (307 ng mL <sup>-1</sup> )<br>LR: 1–10 μM (307–3070 ng mL <sup>-1</sup> )<br>Time: 4 min            | 9         |
| Dipicolinic acid (DPA)                                                            | Anthrax infection                    | Serum<br>Urine | Paper embedded with Terbium/DPA@SiO <sub>2</sub> -Europium/guanosine monophosphate                                      | LOD: 1 μM (167.12 ng mL <sup>-1</sup> )<br>LR: 3–200 μM (<br>Time: 10 min                                     | 10        |
| Brain natriuretic peptide (BNP)<br>Suppression oftumorogenicity (ST2)<br>Estrogen | Heart failure                        | Serum          | Lateral flow immunoassay paper with upconversion nanoparticles (NaYF <sub>4</sub> :Yb,Tm and NaYF <sub>4</sub> :Yb,Er)  | LOD: 29.92 ng mL <sup>-1</sup> (ST2);<br>17.46 pg mL <sup>-1</sup> (BNP)<br>Time: 20 min                      | 11        |
| Estrogen                                                                          | Pre-eclampsia                        | Skin           | Antibody-modified nanoneedles                                                                                           | LOD: 0.13 μM<br>LR: 0.5–1000 ng mL <sup>-1</sup><br>Time: 1 min                                               | 12        |
| <b>Real-time detection</b>                                                        |                                      |                |                                                                                                                         |                                                                                                               |           |
| Hemoglobin                                                                        | Leukemia<br>Anemia<br>Heart diseases | Whole blood    | SiO <sub>2</sub> @ quantum dots integrated in a microchip with acoustofluidic enrichment                                | LOD: 0.035 μg mL <sup>-1</sup><br>LR: 0–100 μg mL <sup>-1</sup><br>Time: 2 min                                | 13        |
| Hg <sup>2+</sup>                                                                  | Intoxication                         | Wastewater     | Paper modified with thymine (T)-mismatched DNA probes                                                                   | LOD: 1 nM (0.0002 μg mL <sup>-1</sup> )<br>LR: 0.001–10 <sup>4</sup> nM                                       | 14        |
| Hg <sup>2+</sup><br>Cholera Toxin B                                               | Intoxication                         | Serum          | -                                                                                                                       | LOD: 0.08 μg mL <sup>-1</sup> (Hg <sup>2+</sup> ), 1.6 ng mL <sup>-1</sup> (Cholera Toxin B)<br>Time: 2–5 min | This work |

- I. P. Alves and N. M. Reis, *Biosens Bioelectron*, 2019, **145**, 111624.
- V. K. Rajendran, P. Bakthavathsalam, P. L. Bergquist and A. Sunna, *Sens Actuat B*, 2019, **298**, 126849.
- K. Ming, J. Kim, M. J. Biondi, A. Syed, K. Chen, A. Lam, M. Ostrowski, A. Rebbapragada, J. J. Feld and W. C. W. Chan, *ACS Nano*, 2015, **9**, 3060–3074.
- F. Sun, A. Ganguli, J. Nguyen, R. Brisbin, K. Shanmugam, D. L. Hirschberg, M. B. Wheeler, R. Bashir, D. M. Nash and B. T. Cunningham, *Lab Chip*, 2020, **20**, 1621–1627.
- F. Hu, J. Li, Z. Zhang, M. Li, S. Zhao, Z. Li and N. Peng, *Anal Chem*, 2020, **92**, 2258–2265.
- Z. Rong, Q. Wang, N. Sun, X. Jia, K. Wang, R. Xiao and S. Wang, *Anal Chim Acta*, 2019, **1055**, 140–147.
- A. I. Barbosa, P. Gehlot, K. Sidapra, A. D. Edwards and N. M. Reis, *Biosens Bioelectron*, 2015, **70**, 5–14.
- X. Kou, L. Tong, Y. Shen, W. Zhu, L. Yin, S. Huang, F. Zhu, G. Chen and G. Ouyang, *Biosens Bioelectron*, 2020, **156**, 112095.
- S. Chu, H. Wang, Y. Du, F. Yang, L. Yang and C. Jiang, *ACS Sus Chem Eng*, 2020, **8**, 8175–8183.
- Q. X. Wang, S. F. Xue, Z. H. Chen, S. H. Ma, S. Zhang, G. Shi and M. Zhang, *Biosens Bioelectron*, 2017, **94**, 388–393.
- M. You, M. Lin, Y. Gong, S. Wang, A. Li, L. Ji, H. Zhao, K. Ling, T. Wen, Y. Huang, D. Gao, Q. Ma, T. Wang, A. Ma, X. Li and F. Xu, *ACS Nano*, 2017, **11**, 6261–6270.
- Y.-E. Kang, K.-Y. Seong, S.-G. Yim, Y. Lee, S.-M. An, S. C. Kim, K. Kim, B.-S. An, K.-S. Lee and S. Y. Yang, *Biosens Bioelectron*, 2020, **163**, 112281.
- L. Zhang, Z. Tian, H. Bachman, P. Zhang and T. J. Huang, *ACS Nano*, 2020, **14**, 3159–3169.
- W.-I. Lee, Y. Park, J. Park, S. Shrivastava, Y.-M. Son, H.-J. Choi, J. Lee, B. Jeon, H. Lee and N.-E. Lee, *Lab Chip*, 2019, **19**, 1502–1511.
